# Supplementary material
Source: PubMed Central journal article supplement (PMC3754702)
Supplement: AEM.01423-13_zam999104614so1.pdf [file AEM.01423-13_zam999104614so1.pdf]

**SUPPLEMENTARY MATERIAL**

**TABLE S1.** *In silico* BLAST analysis for the phylogroup specific probes used

| Probe                    | Strains <sup>a</sup>                                                                                                                                                                                                                                                 |
|--------------------------|----------------------------------------------------------------------------------------------------------------------------------------------------------------------------------------------------------------------------------------------------------------------|
| p <sub>TspE4.C2</sub> B1 | O104:H4, W, IAI1, 55989, SE11, E24377A, KO11, B7A, E22, B171, E110019, O103:H2, B799, H591, TA271, H220, T426, TA141, B088, B574, H420, T408, E1167, H120, H494.                                                                                                     |
| p <sub>chuA</sub> B2     | NA114, O83:H1, UM146, ABU 83972, SE15, LF82, ED1a, IHE3034, S88, O127:H6, APEC O1, 536, UTI89, CFT073, F11, TA104, H001, TA103, B671, M504, H296, H397, TA464, H252, M605, TA435, H588, TA255*, TA206, H305, TA280*, H413, H461, H223, H263, H378, B108, R527, H660. |
| p <sub>chuA</sub> D      | O55:H7, O7:K1, 042, UMN026, IAI39, SMS-3-5, O157:H7, TA143, FVEC 1412, B706, B354, TA024, FVEC 1302, TA124, M056, M114, TA249, H299, B185, TA054, FVEC 1465, M646, PUTI1459, M718, E1492, B093, TA447, B367, E101.                                                   |

<sup>a</sup>All strains, except those indicated with a star, were correctly assigned *in silico* by the real-time PCR probes in accordance with the triplex PCR method (1). The TA255 and TA280 strains exhibit a *chuA* gene of phylogroup F but belong to the phylogroup D.

**TABLE S2.** Efficiencies and reproducibility of the assays

| Probe                    | Slope of the standard curve | Intra-assay reproducibility (% CV <sup>a</sup> of Ct <sup>b</sup> ) |
|--------------------------|-----------------------------|---------------------------------------------------------------------|
| p <sub>TspE4.C2</sub> B1 | -3.32                       | 1.00                                                                |
| p <sub>chuA</sub> B2     | -3.42                       | 0.87                                                                |
| p <sub>chuA</sub> D      | -3.46                       | 0.57                                                                |
| p <sub>yjaA</sub> A1/B2  | -3.36                       | 0.86                                                                |

<sup>a</sup>Coefficient of variation.

<sup>b</sup>Cycle threshold.

Mis en forme : Police :12 pt

**TABLE S3.** Distribution of *E. coli* phylogroups in the feces of 100 healthy subjects of Ile-de-France region and comparison between real-time assay and multiplex PCR assays

| Subject | Real-time PCR assay            | Triplex PCR assay <sup>a</sup><br>major clone | Triplex PCR assay <sup>a</sup><br>20 to 30 clones | Correlation<br>with major<br>clone/20-30<br>clones <sup>c</sup> |
|---------|--------------------------------|-----------------------------------------------|---------------------------------------------------|-----------------------------------------------------------------|
| 1       | 99% A, 1% B2                   | A                                             |                                                   | 1/ND                                                            |
| 2       | 50% A, 50% B2                  | A                                             |                                                   | 1/ND                                                            |
| 3       | 100 % B2                       | B2                                            |                                                   | 1/ND                                                            |
| 4       | 63% A, 24 % B2, 13% D          | A                                             |                                                   | 1/ND                                                            |
| 5       | 80 % B1, 20 % A                | B1                                            | 95% B1, 5% A (20 clones)                          | 1/1                                                             |
| 6       | 63% B2, 37% A                  | A                                             | 50% B2, 50% A (20 clones)                         | 0/1                                                             |
| 7       | 82% A, 17 % B1, 1% B2          | A                                             |                                                   | 1/ND                                                            |
| 8       | 66% B2, 34% A                  | D <sup>b</sup> (F)                            |                                                   | 1/ND                                                            |
| 9       | 58% B2, 42% A                  | B2                                            |                                                   | 1/ND                                                            |
| 10      | 72% B2, 28%A                   | B2                                            |                                                   | 1/ND                                                            |
| 11      | 100% D                         | D                                             | 100% D (20 clones)                                | 1/1                                                             |
| 12      | 99 % A, 0.1% B2                | A                                             | 93% A, 7 % B2 (30 clones)                         | 1/1                                                             |
| 13      | 90% A, 8.5% D, 1.5% B1         | A                                             |                                                   | 1/ND                                                            |
| 14      | 100 % A                        | A                                             |                                                   | 1/ND                                                            |
| 15      | 60 % A, 40 % B1                | A                                             | 70% B1, 30% A (20 clones)                         | 1/1                                                             |
| 16      | 100 % B2                       | D <sup>b</sup> (F)                            |                                                   | 1/ND                                                            |
| 17      | 70 % A, 30% B2                 | A                                             |                                                   | 1/ND                                                            |
| 18      | 71 % A, 29% B2                 | A                                             |                                                   | 1/ND                                                            |
| 19      | 80 % A, 20% B2                 | B2                                            |                                                   | 0/ND                                                            |
| 20      | 57% B2, 30% A, 10% B1,<br>3% D | B2                                            | 73% A, 14% B1, 10% B2, 3% D<br>(30 clones)        | 1/1                                                             |
| 21      | 100 % B2                       | B2                                            |                                                   | 1/ND                                                            |
| 22      | 100% B2                        | B2                                            |                                                   | 1/ND                                                            |
| 23      | 78% B2, 22% A                  | B2                                            |                                                   | 1/ND                                                            |
| 24      | 70% A, 24% B1, 3% B2,<br>3% D  | D                                             | 38% D, 31 % B1, 31 % A (30<br>clones)             | 0/0                                                             |
| 25      | 80% B2, 20 % A                 | D <sup>b</sup> (F)                            |                                                   | 1/ND                                                            |
| 26      | 100 % B2                       | B2                                            |                                                   | 1/ND                                                            |
| 27      | 95% B2, 5% D                   | B2                                            |                                                   | 1/ND                                                            |
| 28      | 98 % B2, 2% B1                 | B2                                            |                                                   | 1/ND                                                            |
| 29      | 100 % B1                       | B1                                            | 100% B1 (30 clones)                               | 1/1                                                             |
| 30      | 40 % B1, 31% A, 29% B2         | A                                             |                                                   | 1/ND                                                            |
| 31      | 100 % B2                       | B2                                            |                                                   | 1/ND                                                            |
| 32      | 62% A, 32% B2, 3% D, 3% B1     | B2                                            |                                                   | 0/ND                                                            |
| 33      | 75% B2, 24 % A, 1% B1          | A                                             |                                                   | 0/ND                                                            |
| 34      | 92% A, 8% B2                   | B2                                            |                                                   | 0/ND                                                            |
| 35      | 99 % B1, 1% A                  | B1                                            |                                                   | 1/ND                                                            |
| 36      | 66 % A, 26 % D, 8 % B2         | D <sup>b</sup> (F)                            |                                                   | 0/ND                                                            |
| 37      | 100 % B2                       | B2                                            |                                                   | 1/ND                                                            |
| 38      | 99% B2, 1% D                   | B2                                            |                                                   | 1/ND                                                            |
| 39      | 98 % A, 2% B2                  | A                                             |                                                   | 1/ND                                                            |
| 40      | 82% A, 18% B1                  | B1                                            |                                                   | 0/ND                                                            |
| 41      | 85% D, 15% A                   | D                                             | 100% D1 (30 clones)                               | 1/0                                                             |
| 42      | 71% A, 26% B2, 3% B1           | B2                                            | 57 % A, 40% B2, 3% B1 (30<br>clones)              | 0/1                                                             |
| 43      | 70 % B1, 20% A, 2% D, 2% B2    | D                                             |                                                   | 0/ND                                                            |
| 44      | 97% A, 2% B2, 1% B1            | A                                             | 100% A (30 clones)                                | 1/0                                                             |
| 45      | 95% B1, 4% A, 0.1% B2          | B1                                            | 100% B1 (30 clones)                               | 1/0                                                             |
| 46      | 99% A, 0.1% B1                 | A                                             | 100% A (30 clones)                                | 1/0                                                             |
| 47      | 98% B2, 2% D                   | B2                                            |                                                   | 1/ND                                                            |
| 48      | 100 % B2                       | B2                                            |                                                   | 1/ND                                                            |
| 49      | 100 % B2                       | B2                                            |                                                   | 1/ND                                                            |
| 50      | 75% A, 15 % B1, 9 % D, 1% B2   | A                                             |                                                   | 1/ND                                                            |
| 51      | 45% B1, 35 % B2, 9% D, 11 % A  | B2                                            |                                                   | 1/ND                                                            |
| 52      | 95% A, 3% B1, 2% B2            | A                                             |                                                   | 1/ND                                                            |
| 53      | 100 % B1                       | B1                                            |                                                   | 1/ND                                                            |

|     |                              |                    |                                                       |      |
|-----|------------------------------|--------------------|-------------------------------------------------------|------|
| 54  | 100% A                       | A                  |                                                       | 1/ND |
| 55  | 80% B2, 20%A                 | B2                 |                                                       | 1/ND |
| 56  | 65% B2, 35%A                 | B2                 |                                                       | 1/ND |
| 57  | 82% D, 18 % A                | D                  |                                                       | 1/ND |
| 58  | 100% B2                      | B2                 |                                                       | 1/ND |
| 59  | 70% B2, 30% A                | B2                 |                                                       | 1/ND |
| 60  | 80% D, 18 % A, 1 % B1, 1% B2 | D <sup>b</sup> (F) | 70% F <sup>b</sup> , 15% A, 10% B1, 5% B2 (20 clones) | 1/1  |
| 61  | 67% A, 32% B2, 1% D          | A                  |                                                       | 1/ND |
| 62  | 86% A, 11% B1, 2% B2, 1% D   | A                  | 80 % A, 20% B1 (30 clones)                            | 1/0  |
| 63  | 65% D, 35% B1                | D <sup>b</sup> (F) |                                                       | 1/ND |
| 64  | 73% D, 17% B2, 10% A         | D                  | 43% D, 28.5% B2, 28.5% A (28 clones)                  | 1/1  |
| 65  | 87% D, 13% A                 | D                  |                                                       | 1/ND |
| 66  | 85% B2, 15% A                | B2                 |                                                       | 1/ND |
| 67  | 74% B1, 15 % A, 11% D        | B1                 |                                                       | 1/ND |
| 68  | 100% D                       | D <sup>b</sup> (F) |                                                       | 1/ND |
| 69  | 92% A, 8% D                  | A                  |                                                       | 1/ND |
| 70  | 60 % B2, 40% B1              | B1                 |                                                       | 0/ND |
| 71  | 68% A, 32% B1                | A                  |                                                       | 1/ND |
| 72  | 99% A, 1% B2                 | A                  |                                                       | 1/ND |
| 73  | 100% A                       | A                  |                                                       | 1/ND |
| 74  | 65% A, 25% D, 10% B2         | A                  | 57% A, 35 % D, 10 % B2 (30 clones)                    | 1/1  |
| 75  | 92% D, 3% B2, 5% A           | D                  |                                                       | 1/ND |
| 76  | 86% A, 14% D                 | D                  |                                                       | 0/ND |
| 77  | 82% B2, 18% A                | D <sup>b</sup> (F) | 77% F <sup>b</sup> , 23% B2 (30 clones)               | 1/0  |
| 78  | 80% B1, 17% A, 3% B2         | A                  |                                                       | 0/ND |
| 79  | 75% B2, 25% A                | B2                 |                                                       | 1/ND |
| 80  | 98% B1, 2% A                 | B1                 | 97% B1, 3% A (30 clones)                              | 1/1  |
| 81  | 80% B2, 17% A, 3% D          | B2                 |                                                       | 1/ND |
| 82  | 80% B2, 20% A                | D <sup>b</sup> (F) |                                                       | 1/ND |
| 83  | 100% A                       | A                  |                                                       | 1/ND |
| 84  | 90% B1, 10% A                | B1                 | 100% B1 (30 clones)                                   | 1/0  |
| 85  | 42% B2, 58% A                | B2                 |                                                       | 1/ND |
| 86  | 74% A, 24% B1, 2% D          | B1                 |                                                       | 0/ND |
| 87  | 57% A, 43% B2                | A                  |                                                       | 1/ND |
| 88  | 100% B2                      | B2                 |                                                       | 1/ND |
| 89  | 71% D, 29% A                 | D                  |                                                       | 1/ND |
| 90  | 53% B1, 47% A                | B1                 |                                                       | 1/ND |
| 91  | 91% B2, 9% A                 | B2                 |                                                       | 1/ND |
| 92  | 100% B2                      | B2                 |                                                       | 1/ND |
| 93  | 100% B2                      | B2                 |                                                       | 1/ND |
| 94  | 59% A, 36% B2, 5% B1         | D <sup>b</sup> (F) |                                                       | 0/ND |
| 95  | 95% A, 4% D, 1% B1           | A                  |                                                       | 1/ND |
| 96  | 92% A, 8% B2                 | A                  |                                                       | 1/ND |
| 97  | 55% A, 40 % B1, 5% B2        | B1                 |                                                       | 0/ND |
| 98  | 55% D, 44% A, 1% B2          | D                  |                                                       | 1/ND |
| 99  | 0                            | 0                  |                                                       | 1/ND |
| 100 | 0                            | 0                  |                                                       | 1/ND |

<sup>a</sup>The results are given in four main phylogroups (A, B1, B2, D), as in (1). However, the new quadriplex PCR method was performed on all the strains to (i) detect the presence of clades and (ii) identify F phylogroup (see <sup>b</sup>).

<sup>b</sup>The determination of the F phylogroup was performed as in (2).

<sup>c</sup>1, correlation; 0, absence of correlation; ND, not determined.

**TABLE S4.** Proportions of *E. coli* phylogroups in the fresh feces and corresponding swabs of eight healthy control subjects using real-time PCR

| Fresh feces | A   | B1  | B2  | D   |
|-------------|-----|-----|-----|-----|
| Subject 1   | 99% | 0%  | 1%  | 0%  |
| Subject 2   | 72% | 1%  | 3%  | 24% |
| Subject 3   | 0%  | 5%  | 95% | 0%  |
| Subject 4   | 40% | 0%  | 60% | 0%  |
| Subject 5   | 30% | 60% | 10% | 0%  |
| Subject 6   | 54% | 1%  | 5%  | 40% |
| Subject 7   | 97% | 0%  | 1%  | 0%  |
| Subject 8   | 72% | 1%  | 5%  | 22% |

  

| Fecal swabs <sup>a</sup> | A   | B1  | B2  | D   |
|--------------------------|-----|-----|-----|-----|
| Subject 1                | 98% | 0%  | 2%  | 0%  |
| Subject 2                | 67% | 0%  | 0%  | 33% |
| Subject 3                | 0%  | 4%  | 96% | 0%  |
| Subject 4                | 25% | 0%  | 75% | 0%  |
| Subject 5                | 46% | 31% | 21% | 2%  |
| Subject 6                | 45% | 1%  | 2%  | 52% |
| Subject 7                | 99% | 0%  | 1%  | 0%  |
| Subject 8                | 79% | 1%  | 1%  | 19% |

<sup>a</sup>The fecal swabs were obtained as described in the ‘materials and methods’ section.

## REFERENCES

1. **Clermont O, Bonacorsi S, Bingen E.** 2000. Rapid and simple determination of the *Escherichia coli* phylogenetic group. *Appl. Environ. Microbiol.* **66**:4555–4558.
2. **Clermont O, Christenson JK, Denamur E, Gordon DM.** 2013. The Clermont *Escherichia coli* phylo-typing method revisited: improvement of specificity and detection of new phylo-groups. *Environ. Microbiol. Rep.* **5**:58–65.
